# Supplementary material
Source: publisher figshare collection journal article supplement (https://gsapubs.figshare.com/ndownloader/files/22746620)
Supplement: Supplementary file 1 [file 22746620]

## FURTHER DISCUSSION OF DUST DEPOSITION AND FIELD-BASED MEASUREMENTS

### Surficial-Geologic Mapping and Surface Descriptions

The surficial geology of Eagle Mtn. piedmont (Fig. 1B) was mapped and correlated to the regional chronosequence of Whitney et al. (2004) using elevation above active channels, terrace dip, depth-of-dissection, degree-of-planarity, and the development of pavement, varnish, and calcic soils as relative-age indicators (McFadden et al., 1987; Bull, 1991). Holocene and Pleistocene units were readily distinguished using pavement and varnish development, as is the case elsewhere in Amargosa Valley (Whitney et al., 2004). Degree of surface planarity was particularly useful for distinguishing between middle-to-late (Qa2) and late Pleistocene (Qa3) units, both of which have moderate to strong pavement and varnish development. Middle-to-late Pleistocene terraces are “crowned,” reflecting a longer interval of diffusive hillslope adjustment compared to late Pleistocene surfaces. Photographs of type-example terrace units are given in Figure DR1. Approximate ages have been assigned based on the regional chronology of Whitney et al. (2004). These authors (and references therein) established a uniquely detailed Quaternary alluvial chronology in northern Amargosa Valley and surrounding areas in support of the Yucca Mountain Project. Terraces on the Eagle Mtn. Piedmont range in age from middle Pleistocene (Qa2), middle to late Pleistocene (Qa3), late Pleistocene (Qa4), and latest Pleistocene to recent (Qa5-Qa7) based on this correlation. It should be noted that the absolute age of each terrace unit is not critical to our study. Mapping was necessary to correlate units so that deposit thickness could be compared on surfaces of comparable age. Constraining the absolute rates of deposition was not attempted.

We utilized surface characteristics uncontrolled or only loosely controlled by dust influx to the greatest extent possible in our mapping. In particular, we relied heavily on the degree-of-planarity and the degree of preserved bar-and-swale microtopography in order to distinguish between surfaces and correlate with the Whitney et al. chronology. As one walks up from the active channel, older surfaces are characterized by a systematic decrease in bar-and-swale texture and a gradual rounding of gully and terrace edges by diffusive hillslope processes. Hsu and Pelletier (2004) documented the usefulness of gully-profile information in relative surface-age dating. Desert varnish and clast rubification can be used to differentiate between Pleistocene and Holocene surfaces, and therefore provides an approximate absolute-age “calibration” for the two other relative-dating methods. We discuss each of these relative-dating methods in detail below.

On both Eagle Mountain piedmont and the type-example surfaces of Whitney et al. (2004) (i.e. Yucca Flat/Fortymile Wash fan), hillslope erosion has performed only minor rounding of Qa6 and Qa5 surfaces. Terrace-bounding scarps of these surfaces rise abruptly to planar surfaces over a distance of less than 1 meter. On Qa4 surfaces, the terrace-bounding scarp is wider: backwearing and hillslope rounding has penetrated 2-4 meters horizontally into the terrace tread. The extent of hillslope rounding increases greatly as one steps up onto the Qa3 and Qa2 deposits (to approximately 10 m and 20-40 m, respectively), reflecting the much longer duration of hillslope erosion experienced by those surfaces. Utilizing the extent of preserved bar-and-swale texture and microtopography is potentially problematic as a correlation tool because this process is

partly dependent on eolian influx. However, bar-and-swale evolution it is also strongly driven by creep (freeze-thaw cycles) and bioturbation.

### Two-Dimensional Model Approximations

Two-dimensional (2D) model solutions identify a fundamental length scale for downwind deposition. Smith (2003) showed that (3) can be approximated a power-law function along the plume centerline:

$$c(x,0,0) = \frac{Q}{2\sqrt{\pi}pL_p} \left( \frac{x}{L_p} \right)^{-3/2}, \quad (\text{DR1})$$

where  $L_p$  is a characteristic length scale given by  $L_p = uK/p^2$ . Figure 2A, for example, presents 2 plots of (DR1) with different sets of model parameters. These parameter sets were chosen to have different values of  $K$  and  $p$  but similar values of  $L_p$ . The similarity of the resulting plots indicates that the pattern of 2D dust deposition is not sensitive to particular parameters; it is only sensitive to the scaling parameter  $L_p$ . Therefore, raising the value of  $K$  and  $p$  simultaneously, as in Figure 2A, leads to solutions that are equally consistent with observations downwind of Franklin Lake playa. This nonuniqueness makes model calibration (in 2D or 3D) difficult. The model is best calibrated using wind-speed data to constrain  $u$  and  $K$  to the greatest extent possible, because these values can be independently determined using readily-available data. The deposition velocity, in contrast, cannot be readily determined. By constraining  $u$  and  $K$ , however, model results can then be run for a range of values of  $p$  to determine the value most consistent with observations.

### Approximations and Limitations of the Numerical Model

The effects of complex downwind topography are only partially represented in the numerical model for several reasons. First, three-dimensional (3D) wind-flow patterns around topographic obstacles are not represented in the model. Including realistic wind-flow patterns would most likely increase the range of dust transport relative to the model of this paper for the same model parameters. The model approximates the effects of complex downwind topography using the downwind plume concentration calculated at the surface elevation  $h(x,y)$  within the deposition term  $pc$ . In other words, the Gaussian plume (with deposition occurring on a flat surface) intersects the complex downwind topography.

The limitation of this approach can be understood by distinguishing between two types of mass loss that occur in natural plumes. In the first type, mass loss occurs because of “skin drag,” in which lower wind speeds near the surface leads to dust fallout. In the second type (i.e. “form drag”), mass loss occurs because the plume intersects a topographic obstacle blocking the flow. This type of deposition is not perfectly effective, however, because most of the dust that intersects the topography is reflected back into the plume. In our model, mass loss occurs only because of the “skin drag” type of deposition due to the assumption of deposition on a horizontal ground surface.

The model results for Eagle Mtn. study area and for the simple test cases suggest that the model is capturing the effects of complex downwind topography despite the model approximation, but it should be emphasized that the model is not an exact solution. A more precise solution (but still neglecting 3D flow fields) would require a 3D finite-

difference solution for the advection-diffusion-settling equation over complex topography. Smith (2003) has laid out a recipe for doing this using computationally-efficient Fourier transform methods. His approach will be adopted in future work. Importantly, Smith's (2003) method also allows for spatial variations in deposition velocity  $p$ . In nature, deposition velocity varies with the surface roughness (e.g. pavement development, vegetation cover). These effects can be included in the model using Smith's approach.

### **Additional Conclusions**

Our results for Franklin Lake playa indicate that deposition rates decrease rapidly as a function of distance crosswind and downwind from playa sources. We began this study by hypothesizing that dust deposition rates would significantly decrease downwind over scales of about 10 km or more. We were surprised to find that deposition rates decrease much more rapidly – by a factor 2 within only 1 km. Although our results are specific to Franklin playa and Eagle Mountain, the pattern of downwind deposition depends on variables (i.e. wind speed  $u$  and deposition coefficient  $p$  (controlled by surface roughness)) that do not vary greatly in regions of similar vegetation cover. As a result, we believe that rapid downwind attenuation of dust deposition is likely to be a general feature of playas in the Basin and Range. Given that playas are typically separated by 10-20 km or more in the Basin and Range, our results imply that eolian deposition rates may vary by an order of magnitude or more depending on distance from nearby playas and prevailing winds. The strong heterogeneity of dust deposition inferred from our study may seem to be an obvious conclusion, but its implications for the evolution of desert surfaces have not yet been widely discussed in the literature. Studies that have documented the role of eolian deposition in pedogenic processes have generally emphasized temporal variability (e.g. higher dust transport rates in the Holocene compared with the Pleistocene) rather than spatial variability. Eolian deposition is known to be the primary driver of desert pavement formation, for example. One implication of our paper is that rates of desert pavement formation may vary by as much as an order of magnitude depending on position relative to dust sources. Our work suggests that distance from playa sources and prevailing winds are important variables that should be considered in order to better understand and quantify rates of desert surface and soil evolution.

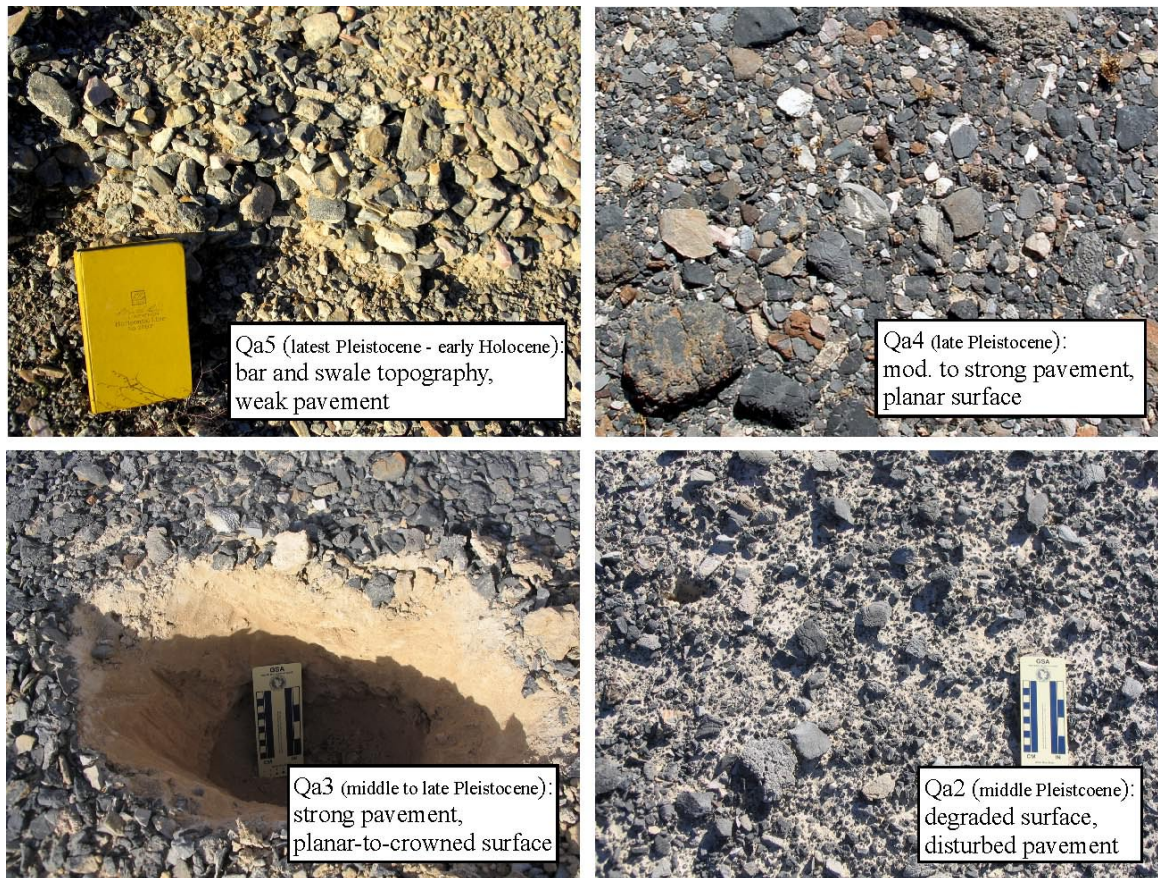

Figure DR1. Type-example surfaces for Qa5-Qa2 on Eagle Mtn. piedmont. Qa5 (latest Pleistocene – early Holocene) exhibits bar-and swale topography and weak pavement and varnish development. Qa4 (late Pleistocene) exhibits strong to moderate pavement and varnish development with no bar-and-swale topography remaining. Qa3 (middle to late Pleistocene) appears similar to Qa4 in many respects (strong pavement and varnish development), but diffusive degradation of the surface has “crowned” the surface. Planar remnants exist only on broad terraces of this unit. Qa2 (middle Pleistocene) exhibits disturbed pavement in many locations due to subsurface piping. Hillslope erosion has removed all planar remnants of this surface. The divide crests were sampled on this surface to minimize the impact of hillslope-erosional loss of eolian material.

## References

- Bull, W.B., 1991, *Geomorphic Responses to Climatic Change*: New York, Oxford University Press, 326 p.
- Hsu, L., and Pelletier, 2004, Correlation and dating of Quaternary alluvial fan surfaces using scarp diffusion: *Geomorphology*, v. 60, 319-335.
- McFadden, L.D., Ritter, J.B., and Wells, S.G., 1989, Use of multi-parameter relative-age estimates for age estimation and correlation of alluvial fan surfaces on a desert piedmont, Eastern Mojave Desert, California: *Quaternary Research*, v. 32, p. 276-290.
- Smith, R.B., 2003, Advection, diffusion, and deposition from distributed sources: *Boundary-Layer Meteorology*, v. 107, p. 273-287.
- Whitney, J.W., Taylor, E.M., and Wesling, J.R., 2004, Quaternary stratigraphy and mapping in the Yucca Mountain area, *in* Keefer, W.R., Whitney, J.W., and Taylor, E.M., eds., *Quaternary Paleoseismology and Stratigraphy of the Yucca Mountain area, Nevada*, U.S. Geological Survey Professional Paper 1689: Reston, Virginia, p. 11-23.

| Waypoint (all UTM zone 11) | Easting | Northing | Age | silt thickness (in) | notes                                 | silt thickness (cm) |
|----------------------------|---------|----------|-----|---------------------|---------------------------------------|---------------------|
| 027                        | 0556040 | 4008797  | Qa2 | 15                  |                                       | 38.1                |
| 100                        | 0556179 | 4009107  | Qa2 | 6                   |                                       | 15.24               |
| 107                        | 0556131 | 4008924  | Qa2 | 7                   |                                       | 17.78               |
| 108                        | 0556199 | 4008824  | Qa2 | 4.5                 |                                       | 11.43               |
| 110                        | 0556259 | 4008726  | Qa2 | 6.5                 |                                       | 16.51               |
| 121                        | 0556248 | 4008335  | Qa2 | 5.5                 |                                       | 13.97               |
| 122                        | 0556389 | 4008349  | Qa2 | 6                   |                                       | 15.24               |
| 123                        | 0556408 | 4008181  | Qa2 | 4.5                 |                                       | 11.43               |
| 140                        | 0556376 | 4007014  | Qa2 | 4                   |                                       | 10.16               |
| 141                        | 0556570 | 4007099  | Qa2 | 4                   |                                       | 10.16               |
| 142                        | 0556717 | 4007145  | Qa2 | 3                   |                                       | 7.62                |
| 143                        | 0556823 | 4007063  | Qa2 | 3                   |                                       | 7.62                |
| 144                        | 0556950 | 4007067  | Qa2 | 1.5                 |                                       | 3.81                |
| 146                        | 0557096 | 4007090  | Qa2 | 3                   |                                       | 7.62                |
| 148                        | 0556216 | 4007021  | Qa2 | 2.5                 |                                       | 6.35                |
| 153                        | 0556163 | 4007581  | Qa2 | 5.5                 |                                       | 13.97               |
| 157                        | 0556062 | 4009164  | Qa2 | 8                   |                                       | 20.32               |
| 013                        | 0556020 | 4007474  | Qa3 | 7                   |                                       | 17.78               |
| 016                        | 0556170 | 4007221  | Qa3 | 5                   |                                       | 12.7                |
| 021                        | 0555983 | 4008021  | Qa3 | 8                   |                                       | 20.32               |
| 022                        | 0555931 | 4009136  | Qa3 | 22                  |                                       | 55.88               |
| 023                        | 0555914 | 4009043  | Qa3 | 19                  |                                       | 48.26               |
| 026                        | 0555896 | 4008942  | Qa3 | 17                  |                                       | 43.18               |
| 030                        | 0555982 | 4008480  | Qa3 | 10.5                |                                       | 26.67               |
| 032                        | 0555924 | 4008323  | Qa3 | 4.5                 |                                       | 11.43               |
| 034                        | 0555918 | 4008199  | Qa3 | 9.5                 |                                       | 24.13               |
| 035                        | 0556024 | 4009274  | Qa3 | 26.5                |                                       | 67.31               |
| 038                        | 0556021 | 4009878  | Qa3 | 7                   |                                       | 17.78               |
| 039                        | 0556119 | 0401009  | Qa3 | 5                   |                                       | 12.7                |
| 040                        | 0556305 | 4010147  | Qa3 | 26.5                |                                       | 67.31               |
| 041                        | 0556142 | 4010200  | Qa3 | 12                  |                                       | 30.48               |
| 037b                       | 0556182 | 4010003  | Qa3 | 24                  |                                       | 60.96               |
| 038b                       | 0556284 | 4009920  | Qa3 | 14                  |                                       | 35.56               |
| 039b                       | 0556214 | 4009975  | Qa3 | 24                  |                                       | 60.96               |
| 040b                       | 0556149 | 4010093  | Qa3 | 22                  |                                       | 55.88               |
| 041b                       | 0556093 | 4010146  | Qa3 | 19.5                |                                       | 49.53               |
| 042                        | 0556264 | 4010068  | Qa3 | 9                   |                                       | 22.86               |
| 045                        | 0556311 | 4010147  | Qa3 | 24.5                |                                       | 62.23               |
| 046                        | 0556301 | 4010226  | Qa3 | 13.5                | close to road, anomalous?<br>degraded | 34.29               |
| 047                        | 0556234 | 4010220  | Qa3 | 9.5                 |                                       | 24.13               |
| 048                        | 0556387 | 4010170  | Qa3 | 32                  |                                       | 81.28               |
| 049                        | 0556379 | 4010129  | Qa3 | 23.5                |                                       | 59.69               |
| 050                        | 0556378 | 4010220  | Qa3 | 30.5                |                                       | 77.47               |
| 051                        | 0556372 | 4010264  | Qa3 | 21                  |                                       | 53.34               |
| 052                        | 0556500 | 4010123  | Qa3 | 26                  |                                       | 66.04               |
| 053                        | 0556594 | 4010085  | Qa3 | 19.5                |                                       | 49.53               |
| 054                        | 0556540 | 4010174  | Qa3 | 12                  |                                       | 30.48               |
| 055                        | 0556555 | 4010338  | Qa3 | 14.5                |                                       | 36.83               |
| 056                        | 0556529 | 4010376  | Qa3 | 17.5                |                                       | 44.45               |
| 057                        | 0556593 | 4010267  | Qa3 | 19                  |                                       | 48.26               |
| 058                        | 0556651 | 4010167  | Qa3 | 16                  |                                       | 40.64               |
| 059                        | 0556681 | 4010105  | Qa3 | 20                  |                                       | 50.8                |
| 061                        | 0556987 | 4009886  | Qa3 | 8.5                 |                                       | 21.59               |
| 062                        | 0557053 | 4009912  | Qa3 | 7                   |                                       | 17.78               |
| 063                        | 0557166 | 4009870  | Qa3 | 10                  |                                       | 25.4                |
| 064                        | 0557287 | 4009746  | Qa3 | 12                  |                                       | 30.48               |
| 065                        | 0557435 | 4009647  | Qa3 | 9                   |                                       | 22.86               |
| 066                        | 0557582 | 4009594  | Qa3 | 7.5                 |                                       | 19.05               |
| 067                        | 0557600 | 4009641  | Qa3 | 11                  |                                       | 27.94               |
| 068                        | 0557627 | 4009723  | Qa3 | 9                   |                                       | 22.86               |
| 069                        | 0557657 | 4009831  | Qa3 | 7                   |                                       | 17.78               |
| 070                        | 0557709 | 4009939  | Qa3 | 11                  |                                       | 27.94               |
| 071                        | 0557737 | 4010036  | Qa3 | 11                  |                                       | 27.94               |
| 072                        | 0557735 | 4010187  | Qa3 | 6.5                 |                                       | 16.51               |
| 073                        | 0557666 | 4010209  | Qa3 | 5.5                 |                                       | 13.97               |
| 075                        | 0557488 | 4010186  | Qa3 | 10                  |                                       | 25.4                |
| 076                        | 0557478 | 4010296  | Qa3 | 8                   | veg. and ponding                      | 20.32               |
| 077                        | 0557432 | 4010454  | Qa3 | 7.5                 |                                       | 19.05               |
| 078                        | 0557386 | 4010633  | Qa3 | 14                  | veg. and ponding                      | 35.56               |
| 079                        | 0557095 | 4010558  | Qa3 | 31                  |                                       | 78.74               |
| 080                        | 0557158 | 4010470  | Qa3 | 12                  | veg. and ponding                      | 30.48               |
| 081                        | 0557174 | 4010381  | Qa3 | 7.5                 |                                       | 19.05               |
| 082                        | 0557158 | 4010184  | Qa3 | 22                  | veg. and ponding                      | 55.88               |
| 083                        | 0557146 | 4010183  | Qa3 | 22                  |                                       | 55.88               |
| 084                        | 0557162 | 4010070  | Qa3 | 19                  |                                       | 48.26               |
| 085                        | 0557053 | 4010096  | Qa3 | 13                  |                                       | 33.02               |
| 086                        | 0556929 | 4010115  | Qa3 | 14                  |                                       | 35.56               |
| 087                        | 0556854 | 4010275  | Qa3 | 26                  |                                       | 66.04               |
| 088                        | 0556715 | 4010299  | Qa3 | 24                  |                                       | 60.96               |
| 090                        | 0555966 | 4009603  | Qa3 | 6.5                 |                                       | 16.51               |
| 091                        | 0556060 | 4009553  | Qa3 | 8                   |                                       | 20.32               |
| 092                        | 0556151 | 4009451  | Qa3 | 9                   |                                       | 22.86               |
| 093                        | 0556158 | 4009377  | Qa3 | 14                  |                                       | 35.56               |
| 094                        | 0556037 | 4009407  | Qa3 | 10                  |                                       | 25.4                |
| 095                        | 0555877 | 4009447  | Qa3 | 8                   |                                       | 20.32               |

|     |         |         |     |      |                              |       |
|-----|---------|---------|-----|------|------------------------------|-------|
| 096 | 0555876 | 4009519 | Qa3 | 1    | Very degraded                | 2.54  |
| 097 | 0555861 | 4009297 | Qa3 | 14   |                              | 35.56 |
| 098 | 0555964 | 4009307 | Qa3 | 24   |                              | 60.96 |
| 099 | 0556092 | 4009313 | Qa3 | 14   |                              | 35.56 |
| 103 | 0555839 | 4009141 | Qa3 | 5    |                              | 12.7  |
| 104 | 0555829 | 4009058 | Qa3 | 5    |                              | 12.7  |
| 105 | 0555828 | 4008943 | Qa3 | 18   |                              | 45.72 |
| 106 | 0555993 | 4008963 | Qa3 | 11.5 |                              | 29.21 |
| 112 | 0556291 | 4008511 | Qa3 | 5.5  |                              | 13.97 |
| 116 | 0555880 | 4008457 | Qa3 | 26   |                              | 66.04 |
| 119 | 0555990 | 4008319 | Qa3 | 6    |                              | 15.24 |
| 120 | 0556106 | 4008313 | Qa3 | 8    |                              | 20.32 |
| 124 | 0556237 | 4008151 | Qa3 | 4.5  |                              | 11.43 |
| 125 | 0556152 | 4008182 | Qa3 | 5    |                              | 12.7  |
| 126 | 0556129 | 4008130 | Qa3 | 8    |                              | 20.32 |
| 127 | 0556019 | 4008173 | Qa3 | 12   |                              | 30.48 |
| 128 | 0555847 | 4008212 | Qa3 | 10   |                              | 25.4  |
| 129 | 0555826 | 4008118 | Qa3 | 6    |                              | 15.24 |
| 130 | 0556012 | 4008032 | Qa3 | 9    |                              | 22.86 |
| 131 | 0556182 | 4008035 | Qa3 | 8    |                              | 20.32 |
| 132 | 0556337 | 4008034 | Qa3 | 6    |                              | 15.24 |
| 133 | 0556226 | 4007972 | Qa3 | 6.5  |                              | 16.51 |
| 134 | 0556218 | 4007785 | Qa3 | 5    |                              | 12.7  |
| 135 | 0556014 | 4007644 | Qa3 | 11   |                              | 27.94 |
| 136 | 0556038 | 4007523 | Qa3 | 9    |                              | 22.86 |
| 137 | 0556177 | 4007481 | Qa3 | 8.5  |                              | 21.59 |
| 138 | 0556272 | 4007484 | Qa3 | 11.5 |                              | 29.21 |
| 139 | 0556101 | 4007427 | Qa3 | 7    |                              | 17.78 |
| 150 | 0556250 | 4006868 | Qa3 | 6.5  |                              | 16.51 |
| 155 | 0555888 | 4009048 | Qa3 | 12   |                              | 30.48 |
| 156 | 0556035 | 4009117 | Qa3 | 9    |                              | 22.86 |
| 158 | 0556062 | 4009524 | Qa3 | 12   |                              | 30.48 |
| 159 | 0555874 | 4009594 | Qa3 | 7    |                              | 17.78 |
| 162 | 0556178 | 4009640 | Qa3 | 11.5 |                              | 29.21 |
| 164 | 0556078 | 4009687 | Qa3 | 6    |                              | 15.24 |
| 165 | 0555971 | 4009903 | Qa3 | 7.5  |                              | 19.05 |
| 166 | 0556006 | 4009984 | Qa3 | 8    |                              | 20.32 |
| 167 | 0556095 | 4010024 | Qa3 | 10   | veg. and ponding             | 25.4  |
| 168 | 0556750 | 4010172 | Qa3 | 24   | veg. and ponding             | 60.96 |
| 169 | 0557038 | 4010309 | Qa3 | 10   | veg. and ponding             | 25.4  |
| 014 | 0556079 | 4007337 | Qa4 | 7    |                              | 17.78 |
| 017 | 0556085 | 4007167 | Qa4 | 7.5  |                              | 19.05 |
| 019 | 0555998 | 4007729 | Qa4 | 7    |                              | 17.78 |
| 024 | 0555936 | 4009061 | Qa4 | 7    |                              | 17.78 |
| 029 | 0555997 | 4008617 | Qa4 | 5.5  |                              | 13.97 |
| 031 | 0555922 | 4008398 | Qa4 |      |                              | 0     |
| 033 | 0555926 | 4008284 | Qa4 | 4.5  |                              | 11.43 |
| 037 | 0556063 | 4009622 | Qa4 | 5.5  |                              | 13.97 |
| 043 | 0556294 | 4010071 | Qa4 | 8.5  |                              | 21.59 |
| 060 | 0556993 | 4009844 | Qa4 | 0    |                              | 0     |
| 074 | 0557617 | 4010236 | Qa4 | 4    |                              | 10.16 |
| 089 | 0555881 | 4009651 | Qa4 | 12   |                              | 30.48 |
| 101 | 0556160 | 4008975 | Qa4 | 11   |                              | 27.94 |
| 102 | 0556077 | 4009066 | Qa4 | 5    |                              | 12.7  |
| 113 | 0555886 | 4008610 | Qa4 | 6    |                              | 15.24 |
| 115 | 0555872 | 4008494 | Qa4 | 11   |                              | 27.94 |
| 117 | 0556014 | 4008428 | Qa4 | 6    |                              | 15.24 |
| 118 | 0555922 | 4008398 | Qa4 | 11   |                              | 27.94 |
| 149 | 0556206 | 4006833 | Qa4 | 4    |                              | 10.16 |
| 151 | 0556103 | 4007033 | Qa4 | 16   | located at base of large Qa2 | 40.64 |
| 152 | 0556164 | 4007109 | Qa4 | 21   | located at base of large Qa2 | 53.34 |
| 154 | 0555942 | 4008686 | Qa4 | 8    |                              | 20.32 |
| 160 | 0556123 | 4009600 | Qa4 | 12   |                              | 30.48 |
| 161 | 0556193 | 4009555 | Qa4 | 9    |                              | 22.86 |
| 163 | 0556120 | 4009675 | Qa4 | 10   |                              | 25.4  |
| 170 | 0557324 | 4010179 | Qa4 | 8    |                              | 20.32 |
| 171 | 0557357 | 4010072 | Qa4 | 17   |                              | 43.18 |
| 172 | 0557370 | 4009985 | Qa4 | 11   |                              | 27.94 |
| 015 | 0556142 | 4007265 | Qa5 | 1.5  |                              | 3.81  |
| 018 | 0556012 | 4007555 | Qa5 | 4    |                              | 10.16 |
| 020 | 0556011 | 4007853 | Qa5 | 1.5  |                              | 3.81  |
| 025 | 0555939 | 4009070 | Qa5 | 1.5  |                              | 3.81  |
| 028 | 0556014 | 4008744 | Qa5 | 4    |                              | 10.16 |
| 036 | 0556006 | 4009347 | Qa5 | 3    |                              | 7.62  |
| 044 | 0556294 | 4010089 | Qa5 | 1    |                              | 2.54  |
